# Supplementary material for: Institutional Culture Matters: Findings from a Ten-Country Survey on Research Integrity in Biomedical Institutions Across Central and Eastern Europe
Source: Research Square preprint supplement (doi:10.21203/rs.3.rs-7087094/v1), 2025-08-18
Supplement: Supplementary file 1 [file aaf9542379f0d28340f86e0d.pdf]

## Questionnaire: Academic and Research Integrity

Dear colleagues,

In recent years, we can observe an increasing importance of academic and research integrity. Nevertheless, little is known about the experiences and attitudes of scientists related to this issue, especially in countries of Central and Eastern Europe.

Therefore, we would like to explore the extent to which academic and research integrity is important to scientists. This survey is performed as a part of the international [Alliance for Life Sciences \(A4L\)](#) project and scientists employed at the project partner institutions are cordially invited to participate in this study.

We would like to ask you to help us by filling out the online questionnaire. This questionnaire is running on Qualtrics platform and is managed by Masaryk University (Brno, Czechia). Participation in this study is voluntary and your answers are anonymous. Personal data and IP addresses are not collected.

Basic definitions of terms used in the questionnaire you can find in the Glossary available at the European Network for Academic Integrity (ENAI) webpage:  
<https://www.academicintegrity.eu/wp/glossary/>

Thank you very much for your time and considering the participation in our survey.

On behalf of the A4L [Focus Group "Research Ethics and Integrity"](#)

Prof. Renata Veselska (Masaryk University, Czechia)  
Prof. Eugenijus Gefenas (Vilnius University, Lithuania)
