# Supplementary material for: Institutional Culture Matters: Findings from a Ten-Country Survey on Research Integrity in Biomedical Institutions Across Central and Eastern Europe
Source: Research Square preprint supplement (doi:10.21203/rs.3.rs-7087094/v1), 2025-08-18
Supplement: Supplementary file 2 [file ec714495934b950ee7d664c9.pdf]

Dear colleagues,

In recent years, we can observe an increasing importance of academic and research integrity. Nevertheless, little is known about the experiences and attitudes of scientists related to this issue, especially in countries of Central and Eastern Europe.

Therefore, we would like to explore the extent to which academic and research integrity is important to scientists. This survey is performed as a part of the international Alliance for Life Sciences (A4L) project and scientists employed at the project partner institutions are cordially invited to participate in this study.

We would like to ask you to help us by filling out the online questionnaire. This questionnaire is running on Qualtrics platform and is managed by Masaryk University (Brno, Czechia). Participation in this study is voluntary and your answers are anonymous. Personal data and IP addresses are not collected. The questionnaire is designed to be completed on a computer, please do not use smartphones. Estimated completion time is about 10 minutes.

Basic definitions of terms used in the questionnaire you can find in the Glossary available at the European Network for Academic Integrity (ENAI) webpage:

<https://www.academicintegrity.eu/wp/glossary/>

Thank you very much for your time and considering the participation in our survey.

On behalf of the A4L Focus Group "[Research Ethics and Integrity](#)"

Prof. Renata Veselska (Masaryk University, Czechia)

Prof. Eugenijus Gefenas (Vilnius University, Lithuania)

**Where did you do your undergraduate studies? (Q1)**

- ☐ In the same country where I work now
- ☐ Elsewhere

**Where did you do your doctoral studies? (Q2)**

- ☐ In the same country where I work now
- ☐ Elsewhere

**For how many years have you been a researcher? (Q3)**

- ☐ 0-5 years
- ☐ 6-10 years
- ☐ 11-15 years
- ☐ >15 years
- ☐ I prefer not to answer.

**How many doctoral students have you supervised? (Q4)**

- ☐ None
- ☐ 1-5 students
- ☐ 6-10 students
- ☐ 11 - 15 students
- ☐ > 15 students
- ☐ I prefer not to answer.

**Your gender? (Q5)**

- ☐ Female
- ☐ Male
- ☐ Other
- ☐ I prefer not to answer.

**Do you have a background in a health profession? (Q6)**

- ☐ Yes
- ☐ No
- ☐ I prefer not to answer.

**What kind of research were you doing during your doctoral studies? (Q7)**

- ☐ Clinical research
- ☐ Basic research (in the life sciences)

☐ Other research

**Have you had lectures or courses in science ethics as part of your undergraduate studies? (Q8)**

- ☐ Yes
- ☐ No
- ☐ I do not remember

**Have you had lectures or courses in science ethics as part of your doctoral studies? (Q9)**

- ☐ Yes
- ☐ No
- ☐ I do not remember

**Have you yourself during the last 12 months been the object of pressure to (Q10)**

|                                               | Yes                   | No                    | I'm uncertain         |
|-----------------------------------------------|-----------------------|-----------------------|-----------------------|
| Fabricate data                                | <input type="radio"/> | <input type="radio"/> | <input type="radio"/> |
| Falsify data                                  | <input type="radio"/> | <input type="radio"/> | <input type="radio"/> |
| Plagiarise data                               | <input type="radio"/> | <input type="radio"/> | <input type="radio"/> |
| Plagiarise publications (in whole or in part) | <input type="radio"/> | <input type="radio"/> | <input type="radio"/> |
| Present results in some other misleading way  | <input type="radio"/> | <input type="radio"/> | <input type="radio"/> |

**Have you yourself during the last 12 months ever (Q11)**

|                                                | Yes                   | No                    | I'm uncertain         |
|------------------------------------------------|-----------------------|-----------------------|-----------------------|
| Fabricated data                                | <input type="radio"/> | <input type="radio"/> | <input type="radio"/> |
| Falsified data                                 | <input type="radio"/> | <input type="radio"/> | <input type="radio"/> |
| Plagiarised data                               | <input type="radio"/> | <input type="radio"/> | <input type="radio"/> |
| Plagiarised publications (in whole or in part) | <input type="radio"/> | <input type="radio"/> | <input type="radio"/> |
| Presented results in some other misleading way | <input type="radio"/> | <input type="radio"/> | <input type="radio"/> |

**Do you know about anyone in your department who during the last 12 months has (Q12)**

|                 | Yes                   | No                    | I'm uncertain         |
|-----------------|-----------------------|-----------------------|-----------------------|
| Fabricated data | <input type="radio"/> | <input type="radio"/> | <input type="radio"/> |
| Falsified data  | <input type="radio"/> | <input type="radio"/> | <input type="radio"/> |

|                                                | Yes                   | No                    | I'm uncertain         |
|------------------------------------------------|-----------------------|-----------------------|-----------------------|
| Plagiarised (in any way)                       | <input type="radio"/> | <input type="radio"/> | <input type="radio"/> |
| Presented results in some other misleading way | <input type="radio"/> | <input type="radio"/> | <input type="radio"/> |

### Have you during the last 12 months been exposed to unethical pressure concerning (Q13)

|                                  | Yes                   | No                    | I'm uncertain         |
|----------------------------------|-----------------------|-----------------------|-----------------------|
| Inclusion or ordering of authors | <input type="radio"/> | <input type="radio"/> | <input type="radio"/> |
| Design/method                    | <input type="radio"/> | <input type="radio"/> | <input type="radio"/> |
| Analysis                         | <input type="radio"/> | <input type="radio"/> | <input type="radio"/> |
| Results                          | <input type="radio"/> | <input type="radio"/> | <input type="radio"/> |

### Have you during the last 12 months been affected by any consequences of scientific misconduct (Q14)

|                  | Yes                   | No                    | I'm uncertain         |
|------------------|-----------------------|-----------------------|-----------------------|
| Ethical          | <input type="radio"/> | <input type="radio"/> | <input type="radio"/> |
| Legal            | <input type="radio"/> | <input type="radio"/> | <input type="radio"/> |
| Methodological   | <input type="radio"/> | <input type="radio"/> | <input type="radio"/> |
| Any other aspect | <input type="radio"/> | <input type="radio"/> | <input type="radio"/> |

### In your work as a scientist, have you engaged in any of the following behaviors in the last three years? (Q15)

|                                                                                                                    | 0 times               | Once                  | Multiple times        | Regularly             | Always                |
|--------------------------------------------------------------------------------------------------------------------|-----------------------|-----------------------|-----------------------|-----------------------|-----------------------|
| Fabricated data?                                                                                                   | <input type="radio"/> |
| To confirm a hypothesis, selectively deleted or changing data after performing data analysis?                      | <input type="radio"/> |
| Deleted data before performing data analysis?                                                                      | <input type="radio"/> |
| Concealed results that contradicted previous research you published?                                               | <input type="radio"/> |
| Used phrases or ideas of others without their permission?                                                          | <input type="radio"/> |
| Used/ing phrases or ideas of others without citation?                                                              | <input type="radio"/> |
| Turned a blind eye to colleagues' use of flawed data or questionable interpretation of data?                       | <input type="radio"/> |
| Modified the results or conclusions of a study under pressure from an organization that (co-) funded the research? | <input type="radio"/> |

|                                                                                                                                                 | 0<br>times            | Once                  | Multiple<br>times     | Regularly             | Always                |
|-------------------------------------------------------------------------------------------------------------------------------------------------|-----------------------|-----------------------|-----------------------|-----------------------|-----------------------|
| Not published (part of) the results of a study?                                                                                                 | <input type="radio"/> |
| Deliberately not mentioned an organization that funded your research in the publication of your study?                                          | <input type="radio"/> |
| Added one or more authors to a report who did not qualify for authorship (honorary author)?                                                     | <input type="radio"/> |
| Selectively modified data after performing data analysis to confirm a hypothesis?                                                               | <input type="radio"/> |
| Reported/ing a downwardly rounded p value (e.g. reporting that a p value of .054 is less than .05)?                                             | <input type="radio"/> |
| Reported an unexpected finding as having been hypothesized from the start?                                                                      | <input type="radio"/> |
| Decided whether to exclude data after looking at the impact of doing so on the results?                                                         | <input type="radio"/> |
| Decided to collect more data after seeing that the results were almost statistically significant?                                               | <input type="radio"/> |
| Omitted a contributor who deserved authorship from the author's list?                                                                           | <input type="radio"/> |
| Stopped collecting data earlier than planned because the result at hand already reached statistical significance without formal stopping rules? | <input type="radio"/> |
| Deliberately failed to mention important aspects of the study in the paper?                                                                     | <input type="radio"/> |
| Not disclosed a relevant financial or intellectual conflict of interest?                                                                        | <input type="radio"/> |
| Spread results over more papers than needed to publish more papers ('salami slicing')?                                                          | <input type="radio"/> |
| Used confidential reviewer information for own research or publications?                                                                        | <input type="radio"/> |

**Please rank the level of your agreement or disagreement with each of the following statements according to the suggested ranking. (Q16)**

| Strongly<br>disagree | Somewhat<br>disagree | Neither<br>agree<br>nor<br>disagree | Somewhat<br>agree | Strongly<br>agree |
|----------------------|----------------------|-------------------------------------|-------------------|-------------------|
|----------------------|----------------------|-------------------------------------|-------------------|-------------------|

It is never appropriate to report experimental data that have been created without actually having conducted the experiment.

☐ ☐ ☐ ☐ ☐

It is never appropriate to alter experimental data to make an experiment look better than it actually was.

☐ ☐ ☐ ☐ ☐

It is never appropriate to try a variety of different methods of analysis until one is found that yields a result that is statistically significant.

☐ ☐ ☐ ☐ ☐

It is never appropriate to take credit for the words or writing of someone else.

☐ ☐ ☐ ☐ ☐

It is never appropriate to take credit for the data generated by someone else.

☐ ☐ ☐ ☐ ☐

It is never appropriate to take credit for the ideas generated by someone else.

☐ ☐ ☐ ☐ ☐

If you are confident of your findings, it is acceptable to selectively omit contradictory results to expedite publication.

☐ ☐ ☐ ☐ ☐

If you are confident of your findings, it is acceptable to falsify or fabricate data to expedite publication.

☐ ☐ ☐ ☐ ☐

It is more important that data reporting be completely truthful in a publication than in a grant application.

☐ ☐ ☐ ☐ ☐

If you witness someone committing research misconduct, you have an ethical obligation to act.

☐ ☐ ☐ ☐ ☐

If you had witnessed a co-worker or peer committing research misconduct, you would be willing to report that misconduct to a responsible official.

☐ ☐ ☐ ☐ ☐

If you had witnessed a supervisor or principal investigator committing research misconduct, you would be willing to report that misconduct to a responsible official.

☐ ☐ ☐ ☐ ☐

If fabricated data are discovered in a published paper, all co-authors must equally share in the blame.

☐ ☐ ☐ ☐ ☐

If fabricated data are discovered in a published paper, all co-authors must get the same punishment.

☐ ☐ ☐ ☐ ☐

**Please rank the level of your agreement or disagreement with each of the following statements according to the suggested ranking. (Q17)**

|                                                                                                                                                                                          | Strongly disagree     | Disagree              | Neither agree nor disagree | Agree                 | Strongly agree        |
|------------------------------------------------------------------------------------------------------------------------------------------------------------------------------------------|-----------------------|-----------------------|----------------------------|-----------------------|-----------------------|
| Severe scientific misconduct (fabrication, falsification, plagiarism) is common in my area of research                                                                                   | <input type="radio"/> | <input type="radio"/> | <input type="radio"/>      | <input type="radio"/> | <input type="radio"/> |
| Less severe scientific misconduct (less than fabrication, falsification, plagiarism) is common in my area of research                                                                    | <input type="radio"/> | <input type="radio"/> | <input type="radio"/>      | <input type="radio"/> | <input type="radio"/> |
| Authorship misconduct (inappropriate authorship) is common in my area of research                                                                                                        | <input type="radio"/> | <input type="radio"/> | <input type="radio"/>      | <input type="radio"/> | <input type="radio"/> |
| The risk of being detected if you commit severe scientific misconduct in my area of research is high                                                                                     | <input type="radio"/> | <input type="radio"/> | <input type="radio"/>      | <input type="radio"/> | <input type="radio"/> |
| The risk of being detected if you commit less severe scientific misconduct in my area of research is high                                                                                | <input type="radio"/> | <input type="radio"/> | <input type="radio"/>      | <input type="radio"/> | <input type="radio"/> |
| The risk of being detected if you commit authorship misconduct in my area of research is high                                                                                            | <input type="radio"/> | <input type="radio"/> | <input type="radio"/>      | <input type="radio"/> | <input type="radio"/> |
| The consequences of being detected if you commit severe scientific misconduct in my area of research are severe (loss of scientific career, loss of funding, retraction of publications) | <input type="radio"/> | <input type="radio"/> | <input type="radio"/>      | <input type="radio"/> | <input type="radio"/> |
| The consequences of being detected if you commit less severe scientific misconduct in my area of research are severe                                                                     | <input type="radio"/> | <input type="radio"/> | <input type="radio"/>      | <input type="radio"/> | <input type="radio"/> |
| The consequences of being detected if you commit authorship misconduct in my area of research are severe                                                                                 | <input type="radio"/> | <input type="radio"/> | <input type="radio"/>      | <input type="radio"/> | <input type="radio"/> |

### Does your department have a written policy about (Q18)

|                                   | Yes                   | No                    | I'm uncertain         |
|-----------------------------------|-----------------------|-----------------------|-----------------------|
| Application for funds             | <input type="radio"/> | <input type="radio"/> | <input type="radio"/> |
| Use of funds                      | <input type="radio"/> | <input type="radio"/> | <input type="radio"/> |
| Changes in design/method          | <input type="radio"/> | <input type="radio"/> | <input type="radio"/> |
| Changes in results                | <input type="radio"/> | <input type="radio"/> | <input type="radio"/> |
| Fabrication of data               | <input type="radio"/> | <input type="radio"/> | <input type="radio"/> |
| Falsification of data             | <input type="radio"/> | <input type="radio"/> | <input type="radio"/> |
| Handling of scientific authorship | <input type="radio"/> | <input type="radio"/> | <input type="radio"/> |

|                                                   | Yes                   | No                    | I'm uncertain         |
|---------------------------------------------------|-----------------------|-----------------------|-----------------------|
| Plagiarism                                        | <input type="radio"/> | <input type="radio"/> | <input type="radio"/> |
| Duplicate publication (publishing the same twice) | <input type="radio"/> | <input type="radio"/> | <input type="radio"/> |
| Harassment                                        | <input type="radio"/> | <input type="radio"/> | <input type="radio"/> |

**Could you please describe how you contribute to your department's publications? Please tick all that apply below. (Q19)**

- ☐ Conceptualization - Ideas; formulation or evolution of overarching research goals and aims
- ☐ Methodology - Development or design of methodology; creation of models
- ☐ Software - Programming, software development; designing computer programs; implementation of the computer code and supporting algorithms; testing of existing code components
- ☐ Validation - Verification, whether as a part of the activity or separate, of the overall replication/ reproducibility of results/experiments and other research outputs
- ☐ Formal analysis - Application of statistical, mathematical, computational, or other formal techniques to analyze or synthesize study data
- ☐ Investigation - Conducting a research and investigation process, specifically performing the experiments, or data/evidence collection
- ☐ Resources - Provision of study materials, reagents, materials, patients, laboratory samples, animals, instrumentation, computing resources, or other analysis tools
- ☐ Data Curation - Management activities to annotate (produce metadata), scrub data and maintain research data (including software code, where it is necessary for interpreting the data itself) for initial use and later reuse
- ☐ Writing - Original Draft - Preparation, creation and/or presentation of the published work, specifically writing the initial draft (including substantive translation)
- ☐ Writing - Review & Editing - Preparation, creation and/or presentation of the published work by those from the original research group, specifically critical review, commentary or revision – including pre-or postpublication stages
- ☐ Visualization - Preparation, creation and/or presentation of the published work, specifically visualization/ data presentation
- ☐ Supervision - Oversight and leadership responsibility for the research activity planning and execution, including mentorship external to the core team
- ☐ Project administration - Management and coordination responsibility for the research activity planning and execution
- ☐ Funding acquisition - Acquisition of the financial support for the project leading to this publication
